# Supplementary material
Source: publisher figshare collection journal article supplement (https://gsajournals.figshare.com/ndownloader/files/14087429)
Supplement: Supplementary file 1 [file 14087429]

## Sheet: Average fold-change
Contrast	CO_down	CO_up	EO_down	EO_up	EPH_down	EPH_up	PH_down	PH_up
ABC transporters	0	2.34545	0	0	0	0	0	6.16458
actin binding	1.45009	0	1.37825	0	0	1.66746	0	0
actin cytoskeleton	1.36988	0	0	0	0	0	0	0
Alanine_ aspartate and glutamate metabolism	2.17707	0	0	0	0	0	0	0
Aminoacyl-tRNA biosynthesis	1.90912	0	0	0	0	0	0	0
angiogenesis	0	0	1.45861	0	0	0	0	0
Antigen processing and presentation	0	4.47805	0	0	0	0	0	0
aorta development	0	0	2.4546	0	0	0	0	0
Apoptosis	1.51951	0	0	0	0	0	0	0
autophagic vacuole	0	5.26042	0	0	0	0	0	0
axon development	0	0	0	0	0	6.55074	0	0
Basal transcription factors	0	0	0	3.43471	3.43471	3.84009	0	0
blood coagulation	0	0	0	0	0	0	2.27825	0
bone development	0	4.41754	0	0	0	3.0098	0	0
carbohydrate metabolic process	0	0	0	0	0	1.78627	0	0
carbonate dehydratase activity	2.68102	0	0	0	0	0	0	0
CD40 receptor complex	3.5747	0	0	0	5.70549	0	0	0
cell cycle	1.57478	0	1.60198	0	1.69427	0	2.36788	0
cell cycle arrest	0	0	0	0	1.80808	0	0	0
cell division	1.41608	0	1.47844	0	1.5266	0	0	0
chaperone binding	0	4.60419	0	0	0	0	0	0
chondrocyte development	0	0	2.56876	0	0	0	0	0
chromosome segregation	0	0	2.18726	0	0	0	0	0
circadian regulation of gene expression	0	0	0	0	0	2.29276	0	0
Citrate cycle (TCA cycle)	0	0	0	0	0	0	4.6277	0
cytoskeleton	0	0	0	0	1.52222	0	0	0
cytoskeleton organization	1.57279	0	0	0	0	0	0	0
definitive hemopoiesis	0	0	0	2.57049	0	0	0	0
DNA replication	1.74025	0	0	0	0	0	0	0
early endosome	1.7184	0	1.73247	0	0	0	2.07628	0
ECM-receptor interaction	1.50807	0	0	0	0	0	0	0
Endocytosis	1.37438	1.89201	0	0	0	1.71878	0	0
endosome	0	2.06462	0	0	0	0	0	0
endothelial cell development	0	0	0	11.7184	0	0	0	0
ephrin receptor signaling pathway	0	3.05104	0	2.65617	0	2.37574	0	0
epidermal growth factor receptor signaling pathway	2.27098	0	2.97027	0	2.41644	0	0	0
ErbB signaling pathway	1.56568	2.15537	0	0	0	2.12119	0	0
fatty acid beta-oxidation	0	0	2.97727	0	3.391	0	0	0
Fatty acid metabolism	1.95115	0	0	0	0	0	0	0
Fc-epsilon receptor signaling pathway	0	0	0	0	1.87864	0	0	0
ferric iron binding	0	0	3.64143	0	0	0	0	0
focal adhesion	1.54522	0	0	1.99213	1.50507	0	2.1447	0
Focal adhesion	1.43505	0	0	0	0	0	0	0
G1/S transition of mitotic cell cycle	1.91122	0	0	0	0	0	0	0
gluconeogenesis	0	0	0	0	0	2.56006	0	0
glucose metabolic process	0	2.9718	0	0	0	2.42973	0	0
Glycerolipid metabolism	0	0	0	0	0	0	3.66723	0
glycolysis	0	3.33569	0	2.8459	0	3.18179	0	0
GnRH signaling pathway	0	2.27803	0	0	0	2.01772	0	0
Golgi apparatus	0	0	1.31951	0	0	0	0	0
heart development	0	0	1.43954	0	0	0	1.90953	0
hematopoietic progenitor cell differentiation	0	0	0	3.69674	0	0	0	0
innate immune response	0	0	1.36529	0	1.58064	0	0	0
insulin receptor signaling pathway	0	0	0	2.26057	0	0	0	0
keratinocyte differentiation	0	0	0	0	0	3.65123	0	0
lipid binding	0	0	1.66101	0	0	0	0	0
liver development	0	0	0	2.01098	0	0	0	0
lysosomal lumen	0	3.80114	0	3.243	0	3.1078	0	0
lysosomal membrane	1.42747	0	0	0	0	0	0	0
lysosome	0	0	0	0	1.83938	0	0	0
Lysosome	0	0	0	0	0	0	2.28663	0
metalloendopeptidase activity	1.54345	0	0	0	0	0	0	0
microtubule cytoskeleton	0	0	1.64045	0	0	0	0	0
microtubule cytoskeleton organization	0	3.52537	0	2.14838	0	1.96522	0	0
midbrain development	0	0	0	0	0	2.75943	0	0
mitochondrial inner membrane	0	0	0	0	1.45407	0	2.39023	0
mitochondrial matrix	1.6875	0	1.5073	0	0	0	0	0
mitochondrion	1.33049	0	1.40245	0	1.31699	0	1.65836	0
mitosis	0	0	1.69865	0	0	0	2.86314	0
monooxygenase activity	0	0	0	0	0	2.14675	0	0
motor activity	1.55672	0	0	0	0	0	0	0
mTOR signaling pathway	1.78214	0	0	0	0	2.42422	0	0
muscle fiber development	2.29802	0	0	0	0	0	0	0
myelin sheath	1.49674	0	0	0	0	0	0	0
myelination	0	0	0	2.65617	0	0	0	0
nervous system development	0	0	0	0	0	0	1.76122	0
neuronal cell body	0	0	0	1.56914	0	0	1.86376	0
Neurotrophin signaling pathway	0	2.87834	0	1.87937	1.87937	1.9611	0	0
neutrophil differentiation	2.75762	0	0	0	3.66782	0	0	0
p53 signaling pathway	1.6999	0	0	0	0	0	0	0
Peptidoglycan biosynthesis	3.24426	0	0	0	0	0	0	0
peroxisome	0	0	1.81635	0	0	0	0	0
Phagosome	0	0	0	0	0	0	2.29337	0
phosphatidylinositol biosynthetic process	0	0	0	0	2.39631	3.56361	0	0
phospholipid metabolic process	2.03688	0	1.97244	0	0	0	0	0
Protein processing in endoplasmic reticulum	1.55896	0	1.58588	0	0	0	0	0
Proximal tubule bicarbonate reclamation	2.4332	0	0	0	0	0	0	0
Purine metabolism	0	0	0	0	0	0	2.26994	0
Ras protein signal transduction	0	0	0	2.71654	0	0	0	0
receptor-mediated endocytosis	1.87593	0	0	0	0	0	0	0
Ribosome	0	0	0	0	0	0	2.87946	0
signal transduction	0	0	0	0	1.22409	0	0	0
skin development	0	0	0	0	0	3.32426	0	0
sphingolipid biosynthetic process	0	0	0	0	2.59997	0	0	0
stem cell maintenance	2.29802	0	3.50657	0	3.56593	0	0	0
T cell receptor signaling pathway	0	2.2985	0	0	0	2.08805	0	0
Tight junction	0	0	0	0	0	0	2.16293	0
Ubiquitin mediated proteolysis	1.61098	0	1.51831	2.19066	2.19066	0	2.67166	0
ubiquitin protein ligase activity	0	0	0	0	0	0	2.47597	0
Valine_ leucine and isoleucine degradation	0	0	2.18726	0	0	0	0	0
vascular endothelial growth factor receptor signaling pathway	2.0015	0	2.03607	0	2.27759	0	0	0
Vasopressin-regulated water reabsorption	0	2.7432	0	2.22896	2.22896	0	0	0
